# Supplementary material for: Two chelating-amino-functionalized lanthanide metal–organic frameworks for adsorption and catalysis
Source: Royal Society of Chemistry journal article supplement (doi:10.1039/c4dt02048k), 2014-11-25
Supplement: c4dt02048k1.pdf [file c4dt02048k1.pdf]

**Electronic Supplementary Information (ESI)**  
**Two Chelating-Amine-Functionalized Lanthanide**  
**Metal-Organic Frameworks for Adsorptions and Catalysis**

Yu Zhu, Yan-Mei Wang, Pan Liu, Chang-Kun Xia, Yun-Long Wu, Xiao-Qing Lu and Ji-Min Xie\*

*School of Chemistry and Chemical Engineering, Jiangsu University, Zhenjiang,  
212013, China*

Email: [xiejm391@sohu.com](mailto:xiejm391@sohu.com); [zhuyu0905@gmail.com](mailto:zhuyu0905@gmail.com)

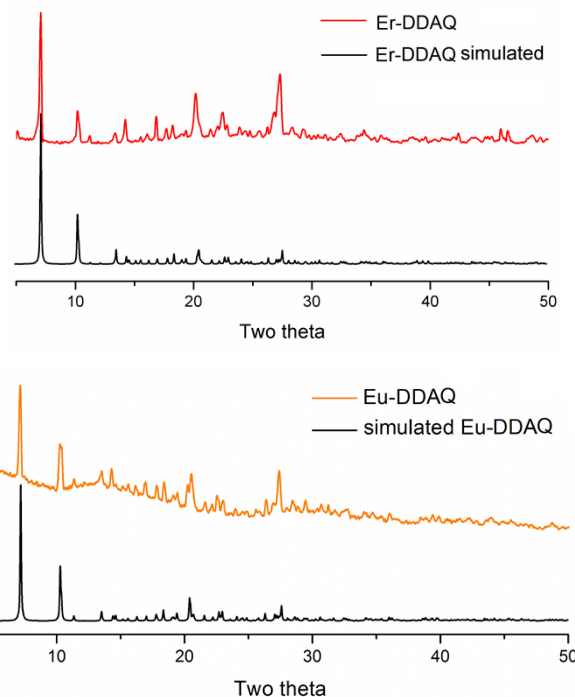

**Fig S1.** PXRD patterns of Er-DADQ and Eu-DADQ.

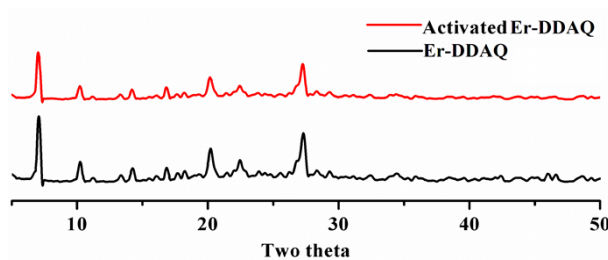

**Fig S2.** PXRD patterns of activated Er-DADQ.

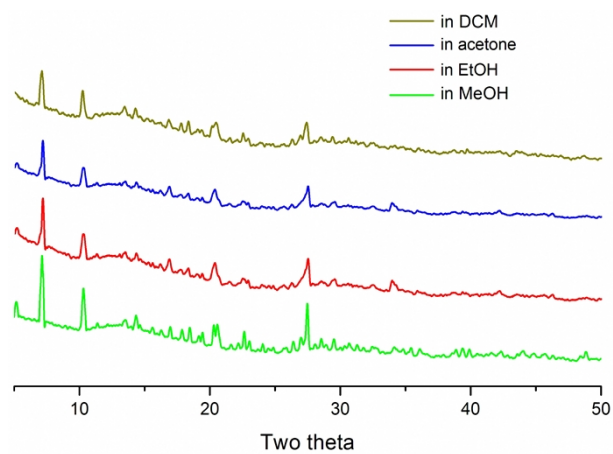

**Fig S3.** PXRD patterns of Er-DADQ after immersing in different solvents for one week.

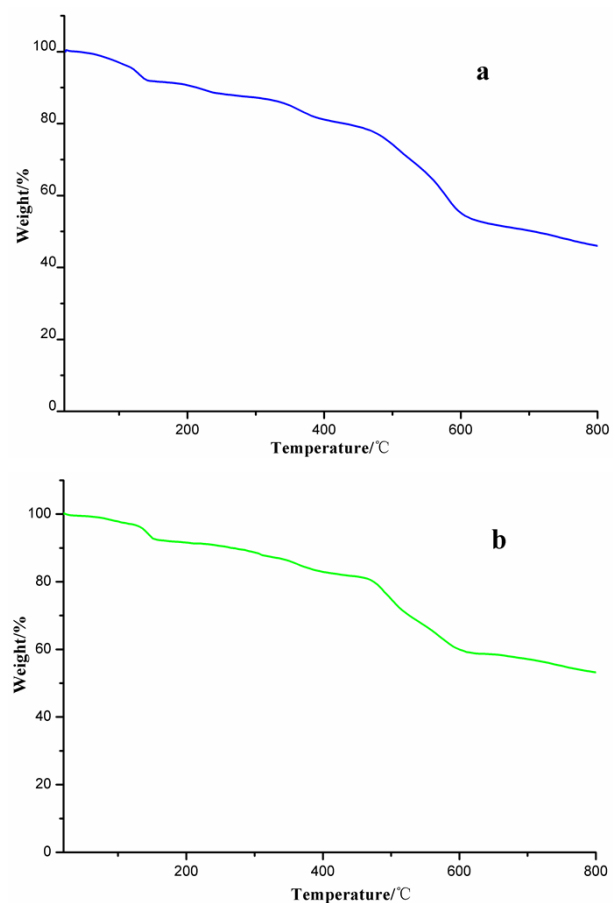

**Fig S4.** TG profiles of Er-DADQ (a) and Eu-DADQ (b)

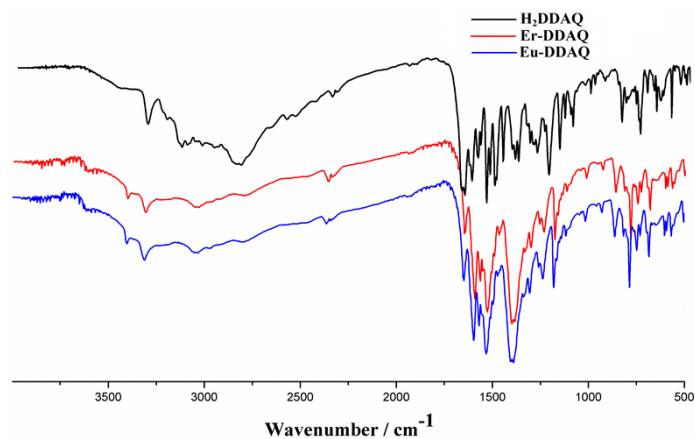

Fig S5. IR spectra of H<sub>2</sub>DADQ, Er-DADQ and Eu-DADQ.

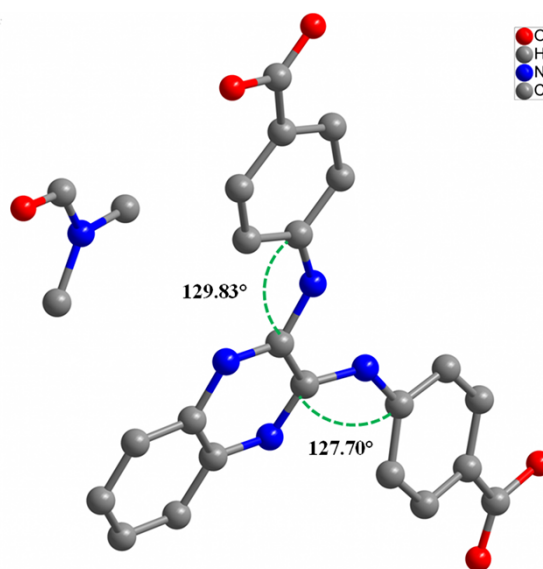

Fig S6. Molecular structure of H<sub>2</sub>DDQ, and H atoms were omitted for clarity.

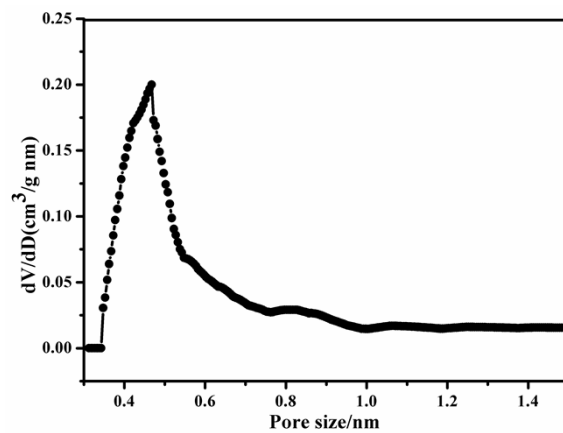

Fig S7. Pore size distribution of Er-DDAQ.

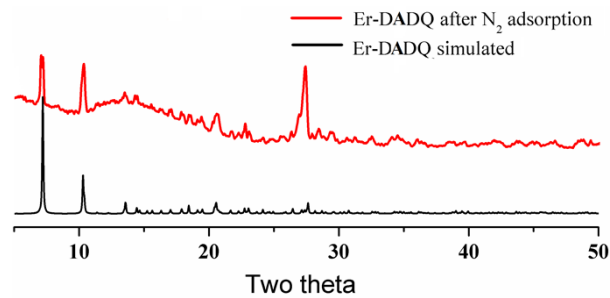

Fig S8. PXRD pattern of Er-DADQ after the  $N_2$  adsorption.

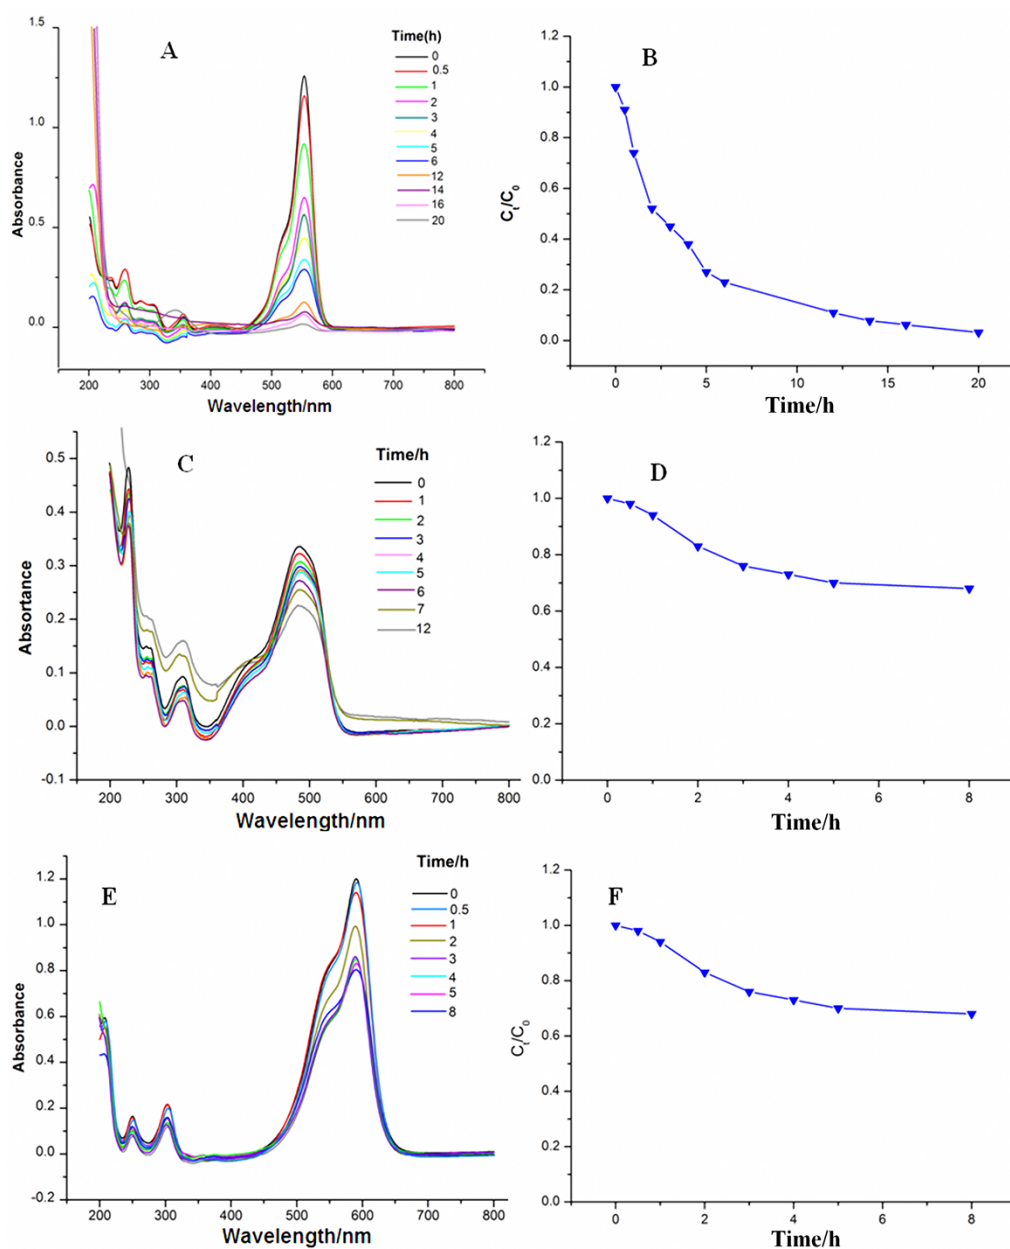

Fig S9. (A, C and E) UV-vis absorption spectra of RhB, MO and CV solutions in the presence of Er-DADQ. (B, D and E) the relationship between  $C_t/C_0$  and reaction time ( $t$ ) in the absorption of RhB, MO and CV.

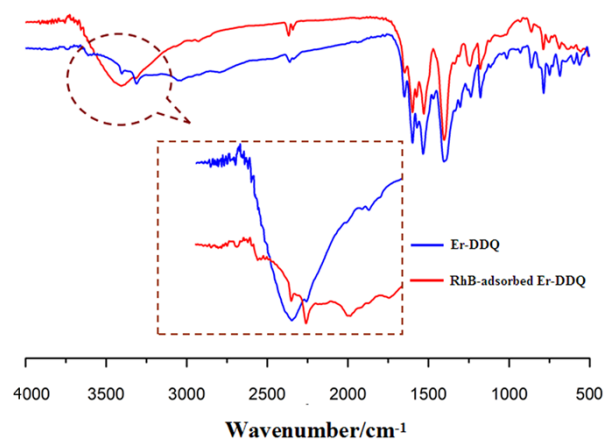

**Fig S10.** Comparison of IR spectra between Er-DADQ and RhB absorbed Er-DADQ.

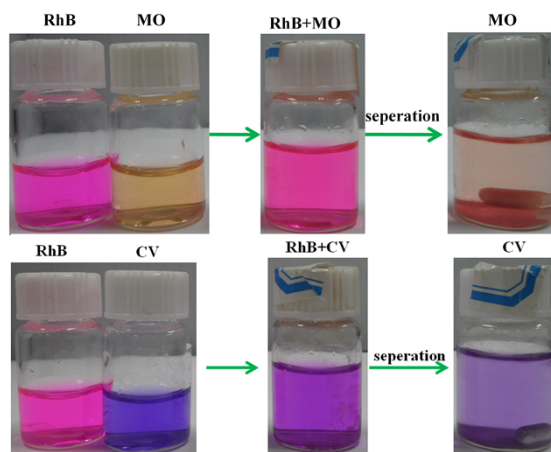

**Fig S11.** Separations process of two equal-mass dyes mixtures in Er-DADQ.

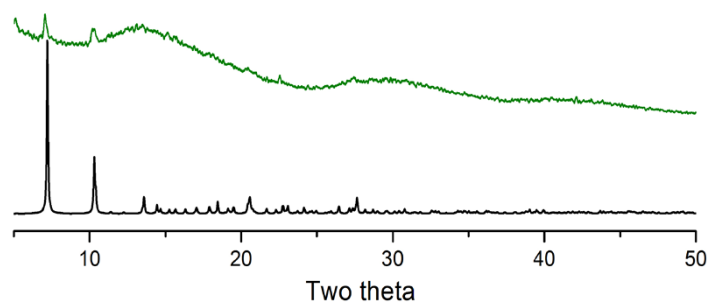

**Fig S12.** PXRD pattern of RhB adsorbed Er-DADQ(green) and simulated Er-DADQ(black).

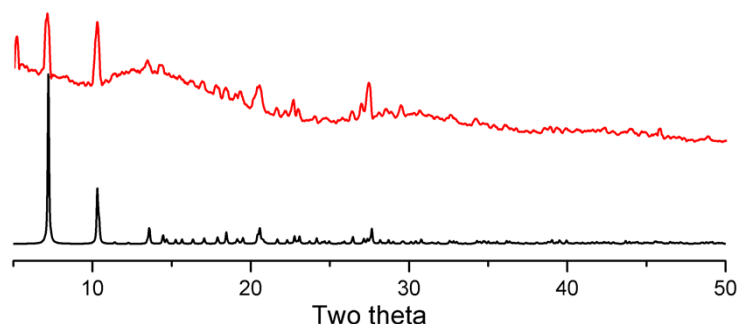

**Fig S13.** PXRD pattern of retrieved ER-DADQ as catalyst (red) and simulated Er-DADQ (black).

**Table S1.** Crystal data and structure refinements for the three compounds

| Compound                                                    | H <sub>2</sub> DADQ                                           | Er-DADQ                                                          | Eu-DADQ                                                          |
|-------------------------------------------------------------|---------------------------------------------------------------|------------------------------------------------------------------|------------------------------------------------------------------|
| Formula                                                     | C <sub>25</sub> H <sub>25</sub> N <sub>5</sub> O <sub>6</sub> | C <sub>44</sub> H <sub>43</sub> ErN <sub>8</sub> O <sub>15</sub> | C <sub>44</sub> H <sub>43</sub> EuN <sub>8</sub> O <sub>15</sub> |
| Formula weight                                              | 491.50                                                        | 1091.12                                                          | 1075.82                                                          |
| Crystal size / mm                                           | 0.34 × 0.26 × 0.22                                            | 0.26 × 0.22 × 0.20                                               | 0.28 × 0.24 × 0.20                                               |
| Crystal system                                              | triclinic                                                     | orthorhombic                                                     | orthorhombic                                                     |
| Space group                                                 | <i>P</i> $\bar{1}$                                            | <i>Pccn</i>                                                      | <i>Pccn</i>                                                      |
| <i>a</i> (Å)                                                | 9.826 (2)                                                     | 13.138 (3)                                                       | 13.166(3)                                                        |
| <i>b</i> (Å)                                                | 11.358 (2)                                                    | 33.947 (7)                                                       | 34.112(7)                                                        |
| <i>c</i> (Å)                                                | 11.609 (2)                                                    | 10.013 (2)                                                       | 10.078(2)                                                        |
| $\alpha$ (°)                                                | 66.07 (3)                                                     | 90.00                                                            | 90.00                                                            |
| $\beta$ (°)                                                 | 84.95 (3)                                                     | 90.00                                                            | 90.00                                                            |
| $\gamma$ (°)                                                | 78.63 (3)                                                     | 90.00                                                            | 90.00                                                            |
| D <sub>c</sub> (g cm <sup>-3</sup> )                        | 1.406                                                         | 1.623                                                            | 1.579                                                            |
| <i>Z</i>                                                    | 2                                                             | 4                                                                | 4                                                                |
| <i>F</i> (000)                                              | 516                                                           | 2204                                                             | 2184                                                             |
| Reflections collected                                       | 8826                                                          | 13058                                                            | 10771                                                            |
| Unique reflections                                          | 4152                                                          | 4268                                                             | 3787                                                             |
| $\mu$ (mm <sup>-1</sup> )                                   | 0.103                                                         | 1.960                                                            | 1.465                                                            |
| <i>R</i> <sub>1</sub> [ <i>I</i> >2 $\sigma$ ( <i>I</i> )]  | 0.0442                                                        | 0.0466                                                           | 0.0764                                                           |
| <i>wR</i> <sub>2</sub> [ <i>I</i> >2 $\sigma$ ( <i>I</i> )] | 0.1092                                                        | 0.1221                                                           | 0.1858                                                           |
| max/min (e Å <sup>-3</sup> )                                | 0.208/-0.190                                                  | 0.726/-0.867                                                     | 0.946/-1.261                                                     |
| Goodness-of-fit on <i>F</i> <sup>2</sup>                    | 1.058                                                         | 1.070                                                            | 1.005                                                            |

**Table S2.** Selected bond lengths (Å) and angles (°) for the three compounds

| <b>H<sub>2</sub>DADQ</b>               |            |                                        |            |                                        |            |
|----------------------------------------|------------|----------------------------------------|------------|----------------------------------------|------------|
| O1-C20                                 | 1.314(2)   | O2-C20                                 | 1.224(2)   | O3-C21                                 | 1.229(2)   |
| O4-C21                                 | 1.317(2)   | N1-C7                                  | 1.303(2)   | N1-C5                                  | 1.376(2)   |
| N2-C8                                  | 1.305(2)   | N2-C6                                  | 1.376(2)   | N3-C7                                  | 1.376(2)   |
| N1-C5-C1                               | 120.20(15) | N1-C5-C6                               | 120.79(15) | C7-N1-C5                               | 118.29(14) |
| C8-N4-C22                              | 127.63(14) | C7-N3-C16                              | 129.84(14) | N2-C6-C5                               | 120.39(15) |
| <b>Er-DADQ</b>                         |            |                                        |            |                                        |            |
| Er1-O1 <sup>#1</sup>                   | 2.253(4)   | Er1-O2 <sup>#2</sup>                   | 2.317(4)   | Er1-O4 <sup>#4</sup>                   | 2.447 (4)  |
| Er1-O5 <sup>#1</sup>                   | 2.403(4)   |                                        |            |                                        |            |
| O1-Er1-O1 <sup>#1</sup>                | 92.05(19)  | O1-Er1-O2 <sup>#2</sup>                | 141.73(14) | O1-Er1-O2 <sup>#3</sup>                | 89.98(13)  |
| O1-Er1-O5                              | 80.48(14)  | O1 <sup>#1</sup> -Er1-O5               | 148.33(14) | O2 <sup>#2</sup> -Er1-O5               | 78.03(14)  |
| O2 <sup>#3</sup> -Er1-O5               | 69.48(14)  | O5-Er1-O5 <sup>#1</sup>                | 120.83(18) | O1-Er1-O4 <sup>#4</sup>                | 74.80(13)  |
| O1 <sup>#1</sup> -Er1-O4 <sup>#4</sup> | 72.58(14)  | O2 <sup>#2</sup> -Er1-O2 <sup>#3</sup> | 111.19(18) | O2 <sup>#2</sup> -Er1-O4 <sup>#4</sup> | 141.27(14) |
| O2 <sup>#3</sup> -Er1-O4 <sup>#4</sup> | 71.15(13)  | O5-Er1-O4 <sup>#4</sup>                | 132.98(14) | O5 <sup>#1</sup> -Er1-O4 <sup>#4</sup> | 73.60(14)  |
| <b>Eu-DADQ</b>                         |            |                                        |            |                                        |            |
| Eu1-O1 <sup>#1</sup>                   | 2.309(7)   | Eu1-O2 <sup>#2</sup>                   | 2.372(7)   | Eu1-O4 <sup>#5</sup>                   | 2.505(8)   |
| Eu1-O5 <sup>#1</sup>                   | 2.436(9)   |                                        |            |                                        |            |
| O1-Eu1-O1 <sup>#1</sup>                | 91.9(4)    | O1-Eu1-O2 <sup>#2</sup>                | 142.1(3)   | O1 <sup>#1</sup> -Eu1-O2 <sup>#2</sup> | 88.7(2)    |
| O2 <sup>#2</sup> -Eu1-O2 <sup>#3</sup> | 113.2(4)   | O1-Eu1-O5                              | 81.5(3)    | O1 <sup>#1</sup> -Eu1-O5               | 148.2(3)   |
| O2 <sup>#2</sup> -Eu1-O5               | 784(3)     | O2-Eu1-O5 <sup>#3</sup>                | 69.2 (3)   | O5-Eu1-O5 <sup>#1</sup>                | 119.3(4)   |
| O1-Eu1-O4 <sup>#5</sup>                | 72.5(3)    | O1 <sup>#1</sup> -Eu1-O4 <sup>#5</sup> | 75.8(3)    | O2 <sup>#2</sup> -Eu1-O4 <sup>#5</sup> | 71.0(3)    |
| O2 <sup>#3</sup> -Eu1-O4 <sup>#5</sup> | 139.3(3)   | O5-Eu1-O4 <sup>#5</sup>                | 72.5(3)    | O5 <sup>#1</sup> -Eu1-O4 <sup>#5</sup> | 134.1(3)   |

<sup>#1</sup> -x+1/2, -y+3/2, z; <sup>#2</sup> x, -y+3/2, z-1/2; <sup>#3</sup> -x+1/2, y, z-1/2; <sup>#4</sup> x+1/2, -y+2, -z+1/2; <sup>#5</sup> -x, y-1/2, -z+1/2

**Table S3** Recycling tests for cyanosilylation of benzaldehyde catalyzed by desolvated Er-DADQ for the same reaction time.

| <b>Run</b>      | <b>Conversion (%)</b> |
|-----------------|-----------------------|
| 1 <sup>st</sup> | 98.2                  |
| 2 <sup>nd</sup> | 97.9                  |
| 3 <sup>rd</sup> | 98.0                  |
| 4 <sup>th</sup> | 97.7                  |
| 5 <sup>th</sup> | 96.9                  |

**Table S4** Test of heterogeneity of the reaction <sup>b</sup>

| Catalyzed reaction |           | reacting after filtration |           |
|--------------------|-----------|---------------------------|-----------|
| Time(min)          | Yield (%) | Time(min)                 | Yield (%) |
| 10                 | 37        | 240                       | 39        |

<sup>b</sup> The catalyzed reaction was carried out for 10 min with Er-DDAQ ultrasonically. Then after filtration of the catalyst, the reaction was continued for another 4h. The yields were determined by GC-MS.
